# Supplementary material for: Air Pressure, Humidity and Stroke Occurrence: A Systematic Review and Meta-Analysis
Source: PubMed Central journal article supplement (PMC4962216; doi:10.3390/ijerph13070675), 2016-07-05

# Supplementary Materials: Air Pressure, Humidity and Stroke Occurrence: A Systematic Review and Meta-Analysis

Yongjun Cao, Xia Wang, Danni Zheng, Thompson Robinson, Daqing Hong, Sarah Richtering, Tzen Hugh Leong, Abdul Salam, Craig Anderson and Maree L Hackett

## Supplementary Material 1 Search Strategy

### MEDLINE

#### Stroke

1. cerebrovascular disorders/or exp basal ganglia cerebrovascular disease/or exp brain ischemia/or exp carotid artery diseases/or exp intracranial arterial diseases/or exp intracranial arteriovenous malformations/or exp “intracranial embolism and thrombosis”/or exp intracranial hemorrhages/or stroke/or exp brain infarction/or vasospasm, intracranial/or vertebral artery dissection/
2. (stroke\$ or poststroke or post-stroke or cerebrovasc\$ or brain vasc\$ or cerebral vasc\$ or cva\$ or apoplex\$ or SAH).tw.
3. ((brain\$ or cerebr\$ or cerebell\$ or intracran\$ or intracerebral) adj3 (isch?emi\$ or infarct\$ or thrombo\$ or emboli\$ or oclus\$)).tw.
4. ((brain\$ or cerebr\$ or cerebell\$ or intracerebral or intracranial or subarachnoid) adj3 (h?emorrhag\$ or h?ematoma\$ or bleed\$)).tw.
5. exp paresis/ or exp Gait Disorders, Neurologic/
6. (hemipleg\$ or hemipar\$ or pares?s or paretic).tw.
7. 1 or 2 or 3 or 4 or 5 or 6

#### Weather

8. exp weather/or exp climate/or exp meteorological concepts/
9. weather or climate
10. (climat\$ or season\$ or humid\$ or latitud\$).tw.
11. (temperature\$ adj3 (hot\$ or cold\$ or ambient or extreme\$ or atmospher\$ or variation\$ or chang\$ or absolute or range\$ or fall\$ or rise\$ or fluctuat\$)).tw
12. ((atmospher\$ or air or barometric) adj3 pressur\$).tw
13. (snow\$ or sun\$ or rain\$ or freez\$ or precipitation\$ or meteorolog\$).tw.
14. 8 or 9 or 10 or 11 or 12 or 13

#### Study type

15. Epidemiologic studies/or Exp case control studies/or Exp cohort studies/or Case control.tw. or (cohort adj (study or studies)).tw. or Cohort analy\$.tw. or (Follow up adj (study or studies)).tw. or (observational adj (study or studies)).tw. or Longitudinal.tw. or Retrospective.tw. or Cross sectional.tw. or Cross-sectional studies/
16. Human/
17. 7 and14 and 15 and 16

**EMBASE****Stroke**

1. 'cerebrovascular disease' or 'basal ganglion hemorrhage'/exp or 'brain hematoma'/exp or 'brain hemorrhage'/exp or 'brain infarction'/exp or 'brain ischemia'/exp or 'carotid artery disease'/exp or 'cerebral artery disease' or 'cerebrovascular accident'/exp or 'intracranial aneurysm'/exp or 'occlusive cerebrovascular disease'/exp or 'stroke unit' or 'stroke patient'
2. (stroke\$ or poststroke or post-stroke or cerebrovasc\$ or brain vasc\$ or cerebral vasc\$ or cva\$ or apoplex\$ or SAH):ab or (stroke\$ or poststroke or post-stroke or cerebrovasc\$ or brain vasc\$ or cerebral vasc\$ or cva\$ or apoplex\$ or SAH):ti
3. ((brain\$ or cerebr\$ or cerebell\$ or intracran\$ or intracerebral) near/3 (isch?emi\$ or infarct\$ or thrombo\$ or emboli\$ or occlus\$)):ti or ((brain\$ or cerebr\$ or cerebell\$ or intracran\$ or intracerebral) near/3 (isch?emi\$ or infarct\$ or thrombo\$ or emboli\$ or occlus\$)):ab
4. ((brain\$ or cerebr\$ or cerebell\$ or intracerebral or intracranial or subarachnoid) near/3 (h?emorrhag\$ or h?ematoma\$ or bleed\$)):ti or ((brain\$ or cerebr\$ or cerebell\$ or intracerebral or intracranial or subarachnoid) near/5 (h?emorrhag\$ or h?ematoma\$ or bleed\$)):ab
5. 'paresis'/exp or 'neurologic gait disorder'/exp
6. (hemipleg\$ or hemipar\$ or paresis or pareses or paretic):ab or (hemipleg\$ or hemipar\$ or paresis or pareses or paretic):ti
7. 1 or 2 or 3 or 4 or 5 or 6

**Weather**

8. 'weather'/exp or 'climate'/exp or 'season'/exp or 'air temperature'/exp or 'environmental temperature'/exp or 'high temperature'/exp or 'low temperature'/exp or 'atmospheric pressure'/exp or 'humidity'/exp or weather or climate or meteorological phenomena
9. (climat\$ or season\$ or humid\$ or latitud\$):ab or (climat\$ or season\$ or humid\$ or latitud\$):ti
10. (temperature\$ near/3 (hot\$ or cold\$ or ambient or extreme\$ or atmospher\$ or variation\$ or chang\$ or absolute or range\$ or fall\$ or rise\$ or fluctuat\$)):ab or (temperature\$ near/3 (hot\$ or cold\$ or ambient or extreme\$ or atmospher\$ or variation\$ or chang\$ or absolute or range\$ or fall\$ or rise\$ or fluctuat\$)):ti
11. ((atmospher\$ or air or barometric) near/3 pressure):ab or ((atmospher\$ or air or barometric) near/3 pressure):ti
12. (snow\$ or sun\$ or rain\$ or freez\$ or precipitation\$ or meteorolog\$):ab or (snow\$ or sun\$ or rain\$ or freez\$ or precipitation\$ or meteorolog\$):ti
13. 8 or 9 or 10 or 11 or 12

**Study type**

14. 'clinical study' or 'case control study' or 'family study' or 'longitudinal study' or 'retrospective study'
15. 'prospective study' not 'randomized controlled trials'
16. 'cohort'
17. Cohort near (analysis or study or studies)
18. (Case control near (study or studies)):ab or (Case control near (study or studies)):ti
19. (follow up near (study or studies)):ab or (follow up near (study or studies)):ti
20. (observational near (study or studies)):ab or (observational near (study or studies)):ti
21. (epidemiologic\$ near (study or studies)):ab or (epidemiologic\$ near (study or studies)):ti
22. (cross sectional near (study or studies)):ab or (cross sectional near (study or studies)):ti
23. 14 or 15 or 16 or or 17 or 18 or 19 Or 20 or 21 or 22

**CINAHL****Stroke**

1. Cerebrovascular Disorders OR (MH "Basal Ganglia Cerebrovascular Disease+") OR (MH "Carotid Artery Diseases+") OR (MH "Cerebral Ischemia+") OR (MH "Arteriovenous Malformations+") OR (MH "Cerebral Vasospasm") OR (MH "Intracranial Arterial Diseases+") OR (MH "Intracranial Embolism and Thrombosis+") OR (MH "Intracranial Hemorrhage+") OR (MH "Stroke+") OR (MH "Vertebral Artery Dissections") or (MH "Stroke Patients") OR (MH "Stroke Units")
2. TI (stroke\* or poststroke or post-stroke or cerebrovasc\* or brain vasc\* or cerebral vasc\* or cva\* or apople\* or SAH) or AB (stroke\* or poststroke or post-stroke or cerebrovasc\* or brain vasc\* or cerebral vasc\* or cva\* or apople\* or SAH)
3. (TI (brain or cerebr\* or cerebell\* or intracran\* or intracerebral) or AB (brain or cerebr\* or cerebell\* or intracran\* or intracerebral)) and (TI (ischemi\* or ischaemi\* or infarct\* or thrombo\* or emboli\* or occlus\*) or AB (ischemi\* or ischaemi\* or infarct\* or thrombo\* or emboli\* or occlus\*))
4. (TI (brain\* or cerebr\* or cerebell\* or intracerebral or intracranial or subarachnoid) or AB (brain\* or cerebr\* or cerebell\* or intracerebral or intracranial or subarachnoid)) and (TI (haemorrhage\* or hemorrhage\* or haematoma\* or hematoma\* or bleed\*) or AB (haemorrhage\* or hemorrhage\* or haematoma\* or hematoma\* or bleed\*))
5. TI (hemipleg\* or hemipar\* or paresis or pareses or paretic ) or AB (hemipleg\* or hemipar\* or paresis or pareses or paretic)
6. 1 or 2 or 3 or 4 or 5 or 6

**Weather**

7. (MH "Meteorological Factors+") or (MH "atmosphere+") OR (MH "Atmospheric Pressure+") or (MH "Weather+") OR (MH "Temperature+")
8. (MM "Cold") OR (MM "Heat") OR (MM "Humidity") OR (MM "Rain") OR (MM "Snow") or (MM "Seasons")
9. AB (climat\$ or season\$ or humid\$ or latitud\$) or TI (climat\$ or season\$ or humid\$ or latitud\$)
10. AB (temperature\$ N3 (hot\$ or cold\$ or ambient or extreme\$ or atmospher\$ or variation\$ or chang\$ or absolute or range\$ or fall\$ or rise\$ or fluctuat\$)) or TI (temperature\$ N3 (hot\$ or cold\$ or ambient or extreme\$ or atmospher\$ or variation\$ or chang\$ or absolute or range\$ or fall\$ or rise\$ or fluctuat\$))
11. TI ((atmospher\$ or air or barometric) N3 pressure) or AB ((atmospher\$ or air or barometric) N3 pressure)
12. TI (snow\$ or sun\$ or rain\$ or freez\$ or precipitation or meteorolog\$) or AB (snow\$ or sun\$ or rain\$ or freez\$ or precipitation\$ or meteorolog\$)
13. 7 OR 8 OR 9 OR 10 OR 11 OR 12

**Study type**

14. Prospective studies OR (MH "Case Control Studies+") or Correlational studies or Nonconcurrent prospective studies or Cross sectional studies or TI (cohort N (study or studies)) OR AB (cohort N (study or studies)) OR TI (observational N (study or studies)) OR AB (observational N (study or studies))

**Web of science**

## Stroke

1. TS=(stroke OR cva OR cerebrovascular OR "cerebral vascular" OR hemipleg\* OR paresis OR pareses OR hemipares\* OR parapares\*)
2. TS=(paretic OR hemiparetic OR paraparetic OR dystoni\*)
3. TS=((cerebral OR cerebellar OR brain\* OR vertebrobasilar) NEAR/3 (infarct\* OR isch\$emi\* OR thrombo\* OR emboli\* OR apoplexy))
4. TS=((cerebral OR brain\* OR subarachnoid) NEAR/3 (haemorrhage OR haemorrhage OR haematoma OR hematoma OR bleed\*))
5. #4 OR #3 OR #2 OR #1

## Weather

6. TS=(weather or climat\* or season\* or humid\* or latitud\* or snow\* or rain\* or precipitation\*)
7. TS=(temperature\* NEAR/3 (hot\* or cold\* or ambient or extreme\* or atmospher\* or variation\* or chang\* or absolute or range\* or fall\$ or rise\$ or fluctuat\$))
8. TS=((atmospher\* or air or barometric) NEAR/3 pressur\*)
9. #6 OR #7 OR #8
10. #5 and #9

**PsycINFO (Ovid)**

## Stroke

1. cerebrovascular disorders/ or cerebral hemorrhage/ or exp cerebral ischemia/ or cerebral small vessel disease/ or cerebrovascular accidents/ or subarachnoid hemorrhage/
2. (stroke or poststroke or post-stroke or cerebrovasc\$ or brain vasc\$ or cerebral vasc\$ or cva\$ or apoplex\$ or SAH).tw.
3. ((brain\$ or cerebr\$ or cerebell\$ or intracran\$ or intracerebral) adj3 (isch?emi\$ or infarct\$ or thrombo\$ or emboli\$ or occlus\$)).tw.
4. ((brain\$ or cerebr\$ or cerebell\$ or intracerebral or intracranial or subarachnoid) adj3 (h?emorrhage\$ or h?ematoma\$ or bleed\$)).tw.
5. hemiparesis/ or hemiplegia/
6. (hemipleg\$ or hemipar\$ or paresis or paretic).tw.
7. or/1-6

## Weather

8. exp seasonal variations/ exp Atmospheric Conditions/
9. (weather or climat\$ or season\$ or humid\$ or latitud\$).tw.
10. (temperature\$ adj3 (hot\$ or cold\$ or ambient or extreme\$ or atmospher\$ or variation\$ or chang\$ or absolute or range\$ or fall\$ or rise\$ or fluctuat\$)).tw.
11. ((atmospher\$ or air or barometric) adj3 pressur\$).tw.
12. (snow\$ or sun\$ or rain\$ or freez\$ or precipitation\$ or meteorolog\$).tw.
13. 8 or 9 or 10 or 11 or 12 or 13
14. 7 and 14

**Geobase**

## Stroke

1. (({nervous system disorder} WN CV OR {nervous system disorder} WN RGI) OR ({stroke} WN CV OR {stroke} WN RGI))
2. ((stroke\$ or poststroke or post-stroke or cerebrovasc\$ or brain vasc\$ or cerebral vasc\$ or cva\$ or apoplex\$ or SAH) WN KY)
3. \$brain near/3 \$ischemi or \$brain near/3 \$ischaemi or \$brain near/3 \$infarct or \$brain near/3 \$thrombo or \$brain near/3 \$emboli or \$brain near/3 \$occlus
4. \$cerebr near/3 \$ischemi or \$cerebr near/3 \$ischaemi or \$cerebr near/3 \$infarct or \$cerebr near/3 \$thrombo or \$cerebr near/3 \$emboli or \$cerebr near/3 \$occlus

5. \$cerebell near/3 \$ischemi or \$cerebell near/3 \$ischaemi or \$cerebell near/3 \$infarct or \$cerebell near/3 \$thrombo or \$cerebell near/3 \$emboli or \$cerebell near/3 \$occlus
  6. \$intracran near/3 \$ischemi or \$intracran near/3 \$ischaemi or \$intracran near/3 \$infarct or \$intracran near/3 \$thrombo or \$intracran near/3 \$emboli or \$intracran near/3 \$occlus
  7. intracerebral near/3 \$ischemi or intracerebral near/3 \$ischaemi or intracerebral near/3 \$infarct or intracerebral near/3 \$thrombo or intracerebral near/3 \$emboli or intracerebral near/3 \$occlus
  8. \$brain near/3 \$hemorrhage or \$cerebr near/3 \$hemorrhage or \$cerebell near/3 \$hemorrhage or \$intracran near/3 \$hemorrhage or intracerebral near/3 \$hemorrhage
  9. \$brain near/3 \$ hematoma or \$cerebr near/3 \$ hematoma or \$cerebell near/3 \$ hematoma or \$intracran near/3 \$ hematoma or intracerebral near/3 \$hematoma
  10. \$brain near/3 \$bleed or \$cerebr near/3 \$bleed or \$cerebell near/3 \$bleed or \$intracran near/3 \$bleed or intracerebral near/3 \$bleed
  11. ((hemiple\$ or hemipar\$ or pares?s or paretic or Neurologic Gait Disorders) WN KY)
- Weather
12. (({atmospheric and meteorological phenomena} WN CV OR {atmospheric and meteorological phenomena} WN RGI) OR ({climate} WN CV OR {climate} WN RGI) OR ({weather} WN CV OR {weather} WN RGI) OR ({severe weather} WN CV OR {severe weather} WN RGI))
  13. ((weather or climat\$ or season\$ or humid\$ or latitud\$) WN KY)
  14. (({air temperature} WN CV OR {air temperature} WN RGI))
  15. (({atmospheric pressure} WN CV OR {atmospheric pressure} WN RGI))
  16. (({season} WN CV OR {season} WN RGI) OR ({seasonality} WN CV OR {seasonality} WN RGI))
  17. ((snow or sun or rain or freeze or precipitation) WN KY)

**Table S1.** Summary characteristics of studies included in meta analysis for mean air pressure and ischaemic stroke.

| Author and Year of Publication | Number of IS Cases Reported | Statistical Analysis Method               | Adjusting Variables                                                            | Reported Estimates                           | Overall Conclusion                             |
|--------------------------------|-----------------------------|-------------------------------------------|--------------------------------------------------------------------------------|----------------------------------------------|------------------------------------------------|
| Dawson 2007                    | 5723                        | Negative binomial model                   | Time trend, season and day of the week                                         | PC in admissions (95%CI): -1.5% (-3.6%–0.7%) | No statistically significant association       |
| Feigin 2000                    | 1929                        | Poisson regression                        | Age, season, geomagnetic and solar activity                                    | RR (95%CI): 0.99 (0.97–1.00)                 | Statistically significant association          |
| Magalhaes 2011                 | 348                         | Poisson regression                        | Not reported                                                                   | RR (95%CI): 1.01 (0.99–1.02)                 | No statistically significant association       |
| Morabito 2011                  | 45,787                      | Poisson generalized linear model          | Years, seasons, days of the week, celebrations, summer decrement of population | Estimate (±SE): -0.017 (±0.005)              | Statistically significant negative association |
| Lee 2008                       | 168,977                     | Auto-regressive integrated moving average | Time trend, season and month                                                   | Estimate (±SE): 0.245 (±0.087)               | Statistically significant positive association |

Abbreviations: IS, ischaemic stroke; PC: percentage change; CI: confidence interval; RR: relative risk; SE: standard error.

**Table S2.** Summary characteristics of studies reporting air pressure change and ischaemic stroke.

| Author and Year of Publication | Number of IS Cases Reported | Variables Studied                             | Statistical Analysis Method | Adjusting Variables                    | Reported Estimates                                                                                                                                     | Overall Conclusion                                                                          |
|--------------------------------|-----------------------------|-----------------------------------------------|-----------------------------|----------------------------------------|--------------------------------------------------------------------------------------------------------------------------------------------------------|---------------------------------------------------------------------------------------------|
| Dawson 2008                    | 5723                        | Change in AP over the preceding 24 h and 48 h | Negative binomial model     | Time trend, season and day of the week | PC in admissions (95%CI): -1.7% (-5.0%–1.7%)                                                                                                           | No statistically significant association                                                    |
| Feigin 2000                    | 1929                        | AP change over the preceding 24 h             | Poisson regression          | None (univariate model)                | Any change towards increasing vs. no change, RR (95%CI): 1.01 (0.89–1.14)<br>Any change towards decreasing vs. no change, RR (95%CI): 1.10 (0.98–1.24) | No statistically significant association                                                    |
| Jimenez-Conde 2008             | 1043                        | AP changes over the preceding 24 h            | log-linear Poisson          | Not explicitly reported                | AP falls: RR, 0.940<br>AP rises: RR, 1.005<br>AP changes: RR, 1.033                                                                                    | Larger AP falls and smaller AP changes are associated with lower risk of non-lacunar stroke |

Abbreviations: AP, atmospheric pressure; IS, ischaemic stroke; PC: percentage change; CI: confidence interval; RR: relative risk

**Table S3.** Summary characteristics of studies included in meta analysis for relative humidity and ischaemic stroke.

| Author and Year of Publication | Number of IS Cases Reported | Statistical Analysis Method               | Adjusting Variables                                                                | Reported Estimates                         | Overall Conclusion                       |
|--------------------------------|-----------------------------|-------------------------------------------|------------------------------------------------------------------------------------|--------------------------------------------|------------------------------------------|
| Feigin 2000                    | 1929                        | Poisson regression                        | None (univariate model)                                                            | RR (95%CI): 1.00 (1.00–1.01)               | No statistically significant association |
| Jimenez-Conde 2008             | 1043                        | Logistic regression                       | Not explicitly reported                                                            | OR (95%CI): 1.00 (0.98–1.01)               | No statistically significant association |
| Lee 2008                       | 168,977                     | Auto-regressive integrated moving average | Time trend and season                                                              | Estimate ( $\pm$ SE): 0.044 ( $\pm$ 0.065) | No statistically significant association |
| Magalhaes 2011                 | 348                         | Poisson regression                        | Not reported                                                                       | RR (95%CI): 1.00 (0.99–1.01)               | No statistically significant association |
| Han 2015                       | 2202                        | Logistic regression                       | Other meteorologic and air pollution parameters, past medical history, age and sex | RR (95%CI): 0.99 (0.95–1.03)               | No statistically significant association |

Abbreviations: IS, ischaemic stroke; RR: relative risk; OR: odds ratio; SE: standard error; CI: confidence interval.

**Table S4.** Summary characteristics of studies included in meta analysis for mean air pressure and intracerebral haemorrhage.

| Author and Year of Publication | Number of ICH Cases Reported | Statistical Analysis Method | Adjusting Variables                     | Reported Estimates                                         | Overall Conclusion                       |
|--------------------------------|------------------------------|-----------------------------|-----------------------------------------|------------------------------------------------------------|------------------------------------------|
| Feigin 2000                    | 215                          | Poisson regression          | None (univariate model)                 | RR (95%CI): 1.01 (0.99–1.03)                               | No statistically significant association |
| Dawson 2008                    | 666                          | Poisson regression          | Time trend, season, and day of the week | PC in admissions (95%CI): -4.0% (-9.5%–-1.9%) (per 10 hPa) | No statistically significant association |
| Magalhaes 2011                 | 91                           | Poisson regression          | Not reported                            | RR (95%CI): 1.00 (0.97–1.03)                               | No statistically significant association |

Abbreviations: ICH, intracerebral haemorrhage; PC: percentage change; CI: confidence interval; RR: relative risk.

**Table S5.** Summary characteristics of studies reporting air pressure change and intracerebral haemorrhage.

| Author and Year of Publication | Number of ICH Cases Reported | Weather Parameter Studied                   | Analysis Model                                     | Adjusting Variables                     | Reported Estimates                                                                                                                                                              | Overall Conclusion                                                                            |
|--------------------------------|------------------------------|---------------------------------------------|----------------------------------------------------|-----------------------------------------|---------------------------------------------------------------------------------------------------------------------------------------------------------------------------------|-----------------------------------------------------------------------------------------------|
| Dawson 2008                    | 666                          | AP change over the preceding 24 h and 48 h  | Poisson regression                                 | Time trend, season, and day of the week | PC in admissions (95%CI): -1.1% (-9.8%–-8.6%) (per 10 hPa change over preceding 24 h)<br>PC in admissions (95%CI): -6.6% (-12.7%–-0.2%) (per 10 hPa change over preceding 48 h) | Significant association between fall in AP over the preceding 48 h with increased rate of ICH |
| Feigin 2000                    | 215                          | AP change over the preceding 24 h           | Poisson regression                                 | None (univariate model)                 | Any change towards increasing vs. no change, RR (95%CI): 0.85 (0.58–1.24)<br>Any change towards decreasing vs. no change, RR (95%CI): 1.36 (0.96–1.92)                          | No statistically significant association                                                      |
| Jimenez-Conde 2008             | 243                          | AP changes with respect to the previous day | Logistic regression, log-linear Poisson regression | Not explicitly reported                 | AP variations: RR: 1.04, <i>p</i> value 0.124<br>AP falls: RR: 0.97, <i>p</i> value 0.431<br>AP rises: RR: 1.07, <i>p</i> value 0.027                                           | Significant association between rises in AP and risk of ICH                                   |

Abbreviations: AP, atmospheric pressure; IS, ischaemic stroke; ICH, intracerebral haemorrhage; hpa, hectopascals; PC: percentage change; CI: confidence interval; RR: relative risk.

**Table S6.** Summary characteristics of studies included in meta analysis for mean humidity and intracerebral haemorrhage.

| Author and Year of Publication | Number of ICH Cases Reported | Analysis Model                        | Adjusting Variables                                               | Reported Estimates                               | Overall Conclusion                       |
|--------------------------------|------------------------------|---------------------------------------|-------------------------------------------------------------------|--------------------------------------------------|------------------------------------------|
| Feigin 2000                    | 215                          | Poisson regression                    | None (univariate model)                                           | RR (95%CI): 1.00 (0.98–1.01)                     | No statistically significant association |
| Jimenez-Conde 2008             | 243                          | Logistic regression                   | Not explicitly reported                                           | OR (95%CI): 1.00 (0.98–1.01)                     | No statistically significant association |
| Magalhaes 2011                 | 91                           | Poisson regression                    | Not reported                                                      | RR (95%CI): 1.02 (0.99–1.04)                     | No statistically significant association |
| Han 2015                       | 799                          | Poisson generalized linear regression | Temperature range, humidity, PM <sub>10</sub> and NO <sub>2</sub> | RR (95%CI): 1.02 (0.95–1.09) (per 5% increments) | No statistically significant association |

Abbreviations: ICH, intracerebral haemorrhage; PC: percentage change; CI: confidence interval; RR: relative risk; OR: odds ratio.

**Table S7.** Summary characteristics of studies included in systematic review for mean humidity and intracerebral haemorrhage.

| Author and Year of Publication | Number of ICH Cases Reported | Weather Parameter Studied                                                                  | Analysis Model     | Adjusting Variables     | Reported Estimates                                                                       | Overall Conclusion                       |
|--------------------------------|------------------------------|--------------------------------------------------------------------------------------------|--------------------|-------------------------|------------------------------------------------------------------------------------------|------------------------------------------|
| Feigin 2000                    | 215                          | Mean humidity, categorical: mild (73% to 83%) vs. high (>84%), low (<72%) vs. high (>84%). | Poisson regression | None (univariate model) | Mild vs high: RR (95%CI): 1.00 (0.98–1.01)<br>Low vs. high: RR (95%CI): 1.20 (0.38–3.76) | No statistically significant association |

Abbreviations: ICH, intracerebral haemorrhage; CI: confidence interval; RR: relative risk.

**Table S8.** Summary characteristics of studies included in meta analysis for mean air pressure and subarachnoid haemorrhage.

| Author and Year of Publication | Number of SAH Cases Reported | Statistical Analysis Method                    | Adjusting Variables                         | Reported Estimates                         | Overall Conclusion                                                 |
|--------------------------------|------------------------------|------------------------------------------------|---------------------------------------------|--------------------------------------------|--------------------------------------------------------------------|
| Abe 2008                       | 1729                         | Autoregressive integrated moving average model | Temperature and humidity                    | Estimate ( $\pm$ SE): 0.039 ( $\pm$ 0.012) | Statistically significant association between high AP and SAH risk |
| Feigin 2000                    | 64                           | Poisson regression                             | Age, season, geomagnetic and solar activity | RR (95%CI): 0.99 (0.95–1.03)               | No statistically significant association                           |

Abbreviation: SAH, subarachnoid aneurysmal haemorrhage; AP, atmospheric pressure; SE: standard error.



**Table S9.** Summary characteristics of studies included in systematic review for air pressure change and subarachnoid haemorrhage.

| Author and Year of Publication | Number of SAH Cases Reported | Weather Variable Studied                        | Statistical Analysis Method | Adjusting Variables                         | Reported Estimates                                                                                                                                     | Overall Conclusion                                                    |
|--------------------------------|------------------------------|-------------------------------------------------|-----------------------------|---------------------------------------------|--------------------------------------------------------------------------------------------------------------------------------------------------------|-----------------------------------------------------------------------|
| Feigin 2000                    | 64                           | AP change over the preceding 24 h               | Poisson regression          | None (univariate model)                     | Any change towards increasing vs. no change, RR (95%CI): 0.62 (0.32–1.22)<br>Any change towards decreasing vs. no change, RR (95%CI): 0.57 (0.29–1.14) | No statistically significant association                              |
| Lejeune, 1994                  | 238                          | Reduction of 100 Pa of AP on the day before SAH | Logistic regression         | Temperature, humidity and sunshine duration | OR (95%CI) 1.02 (1.01–1.02)                                                                                                                            | AP reduction the day before SAH is associated with higher risk of SAH |

Abbreviations: AP, atmospheric pressure; SAH, subarachnoid aneurysmal haemorrhage.

**Table S10.** Summary characteristics of studies included in systematic review for humidity and subarachnoid haemorrhage.

| Author and Year of Publication | Number of SAH Cases Reported | Temperature Variable Studied                          | Statistical Analysis Method | Adjusting Variables                             | Reported Estimates                                                                                                                                     | Overall Conclusion                                                                                   |
|--------------------------------|------------------------------|-------------------------------------------------------|-----------------------------|-------------------------------------------------|--------------------------------------------------------------------------------------------------------------------------------------------------------|------------------------------------------------------------------------------------------------------|
| Lai 2014                       | 16,970                       | Monthly mean humidity                                 | Linear regression           | Sex                                             | Estimate (95%CI): -0.041 (-0.05–0.03)                                                                                                                  | Statistically significant association between lower relative humidity and increase in SAH admissions |
| Oyoshi 1999                    | 210                          | Monthly mean humidity                                 | Pearson correlation         | N/A                                             | Correlation coefficient 0.14                                                                                                                           | No statistically significant association                                                             |
| Feigin 2000                    | 64                           | Humidity change over the preceding 24 h               | Poisson regression          | None (univariate model)                         | Any change towards increasing vs. no change, RR (95%CI): 0.74 (0.39–1.43)<br>Any change towards decreasing vs. no change, RR (95%CI): 0.74 (0.37–1.47) | No statistically significant association                                                             |
| Lejeune, 1994                  | 238                          | Reduction of 1% of minimal humidity on the day of SAH | Logistic regression         | Temperature, air pressure and sunshine duration | OR (95%CI): 1.03 (1.01–1.04)                                                                                                                           | Reduction in humidity on day of SAH is associated with higher risk of SAH                            |

Abbreviations: SAH, subarachnoid aneurysmal haemorrhage; CI, confidence interval; RR, relative risk.

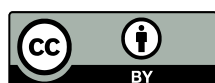

Supplement: ijerph-13-00675-s001.pdf [file ijerph-13-00675-s001.pdf]
